# Supplementary material
Source: PubMed Central journal article supplement (PMC8507028)
Supplement: ajtr0013-10163-f9.pdf [file ajtr0013-10163-f9.pdf]

## The role of FAM107A in prostate carcinoma

**Supplementary Table 1.** The association between the FAM107A expression and the clinicopathologic features

| Characters                  | level                      | Low expression of FAM107A | High expression of FAM107A | P      | test    |
|-----------------------------|----------------------------|---------------------------|----------------------------|--------|---------|
| n                           |                            | 248                       | 247                        |        |         |
| T stage (%)                 | T2                         | 72 (29.3%)                | 115 (47.5%)                | <0.001 | exact   |
|                             | T3                         | 167 (67.9%)               | 124 (51.2%)                |        |         |
|                             | T4                         | 7 (2.8%)                  | 3 (1.2%)                   |        |         |
| N stage (%)                 | N0                         | 163 (73.4%)               | 181 (90.5%)                | <0.001 |         |
|                             | N1                         | 59 (26.6%)                | 19 (9.5%)                  |        |         |
| M stage (%)                 | M0                         | 224 (98.7%)               | 229 (100.0%)               | 0.123  | exact   |
|                             | M1                         | 3 (1.3%)                  | 0 (0.0%)                   |        |         |
| Gleason score (%)           | 10                         | 3 (1.2%)                  | 1 (0.4%)                   | <0.001 | exact   |
|                             | 6                          | 12 (4.8%)                 | 33 (13.4%)                 |        |         |
|                             | 7                          | 103 (41.5%)               | 143 (57.9%)                |        |         |
|                             | 8                          | 39 (15.7%)                | 24 (9.7%)                  |        |         |
|                             | 9                          | 91 (36.7%)                | 46 (18.6%)                 |        |         |
| Primary therapy outcome (%) | CR                         | 154 (72.6%)               | 183 (82.4%)                | 0.045  |         |
|                             | PD                         | 14 (6.6%)                 | 14 (6.3%)                  |        |         |
|                             | PR                         | 27 (12.7%)                | 13 (5.9%)                  |        |         |
|                             | SD                         | 17 (8.0%)                 | 12 (5.4%)                  |        |         |
| Residual tumor (%)          | R0                         | 145 (62.5%)               | 169 (72.5%)                | 0.061  | exact   |
|                             | R1                         | 84 (36.2%)                | 62 (26.6%)                 |        |         |
|                             | R2                         | 3 (1.3%)                  | 2 (0.9%)                   |        |         |
| Race (%)                    | Asian                      | 9 (3.7%)                  | 3 (1.3%)                   | 0.152  |         |
|                             | Black/African American     | 31 (12.8%)                | 25 (10.5%)                 |        |         |
|                             | White                      | 202 (83.5%)               | 210 (88.2%)                |        |         |
| Zone of origin (%)          | Central Zone               | 3 (2.0%)                  | 1 (0.8%)                   | 0.314  | exact   |
|                             | Overlapping/Multiple Zones | 76 (50.0%)                | 50 (41.0%)                 |        |         |
|                             | Peripheral Zone            | 68 (44.7%)                | 68 (55.7%)                 |        |         |
|                             | Transition Zone            | 5 (3.3%)                  | 3 (2.5%)                   |        |         |
| TP53 status (%)             | Mut                        | 39 (15.7%)                | 17 (7.0%)                  | 0.004  |         |
|                             | WT                         | 209 (84.3%)               | 227 (93.0%)                |        |         |
| Age (median [IQR])          |                            | 62.00 (56.00, 66.00)      | 61.00 (56.00, 66.00)       | 0.143  | nonnorm |
| PSA (ng/ml) (median [IQR])  |                            | 0.10 (0.03, 0.26)         | 0.10 (0.03, 0.10)          | 0.105  | nonnorm |

Note: "exact" means that the statistical method was Fisher's exact test. "nonnorm" means a non-normal distribution and a Wilcoxon rank sum test was used for the statistical analysis.
